# Supplementary material for: Endothelial cell colony forming units derived from malignant breast diseases are resistant to tumor necrosis factor-α-induced apoptosis
Source: PubMed Central journal article supplement (PMC5121583; doi:10.1038/srep37450), 2016-11-24
Supplement: srep37450-s1.pdf [file srep37450-s1.pdf]

# **Endothelial cell colony forming units derived from malignant breast diseases are resistant to tumor necrosis factor- $\alpha$ -induced apoptosis**

Chen-Pin Chou , Shih Sheng Jiang, Huay-Ben Pan, Yi-Chen Yen, Hui-Hwa Tseng, Yu-Ting Hung,

Ssu-Han Wang, Yu-Lin Chen, Ya-Wen Chen

## **Supplementary data**

Table S1. Clinicopathologic parameters of 50 women with breast diseases

| <b>Clinical parameter</b>               | <b>No. (%)</b> |
|-----------------------------------------|----------------|
| <b>Age</b>                              |                |
| ≥ 50                                    | 17 (34)        |
| < 50                                    | 23 (66)        |
| <b>Pathology Type</b>                   |                |
| Malignancy                              | 30 (60)        |
| Benign                                  | 20 (40)        |
| <b>TNM cancer stage (30 malignancy)</b> |                |
| 0                                       | 8 (27)         |
| I                                       | 8 (27)         |
| II                                      | 14 (46)        |
| <b>Histology (30 malignancy)</b>        |                |
| Invasive carcinoma                      | 22 (73)        |
| Non-invasive carcinoma                  | 8 (27)         |

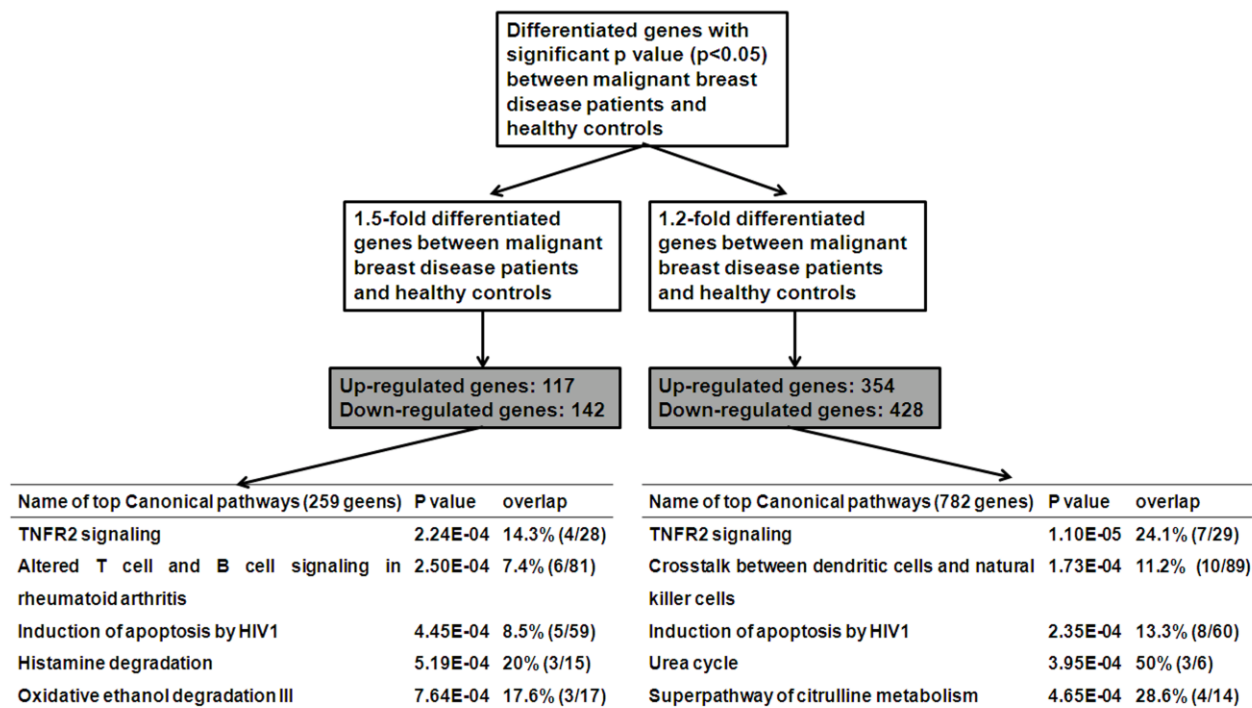

Figure S1. Ingenuity pathway analysis (IPA) of de-regulated genes with high and low fold change among endothelial cell colony-forming units (EC-CFUs) from healthy controls and malignant breast disease patients.

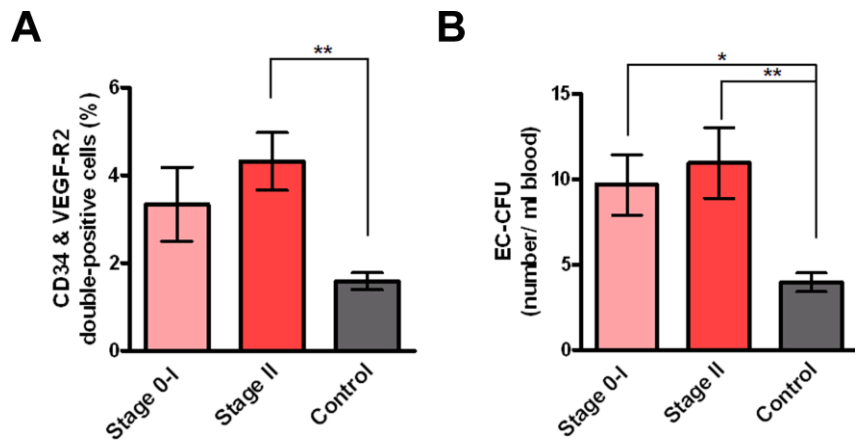

Figure S2. Comparison of levels of CD34<sup>+</sup>VEGFR2<sup>+</sup> cells and endothelial cell colony-forming units in malignant breast disease patients with stage 0-I and II. (A) The incidence of CD34<sup>+</sup>VEGFR2<sup>+</sup> cells in whole blood from patients with stage 0-I (n=14), stage II (n=13) malignant breast diseases, and healthy controls (n=10). (B) The number of EC-CFUs per ml of whole blood from patients with stage 0-I (n=16), stage II (n=14) malignant breast diseases, and healthy controls (n=11). Bars, SE; \**p*<0.05; \*\**p*<0.01.
